# Supplementary material for: Theoretical study on the gas phase reaction of acrylonitrile with a hydroxyl radical
Source: Royal Society of Chemistry journal article supplement (doi:10.1039/c1cp20836e), 2011-01-01
Supplement: c1cp20836e.pdf [file c1cp20836e.pdf]

## Supporting Information

### Theoretical study on the gas phase reaction of acrylonitrile with hydroxyl radical

Jingyu Sun,<sup>1</sup> Rongshun Wang<sup>1\*</sup>, Baoshan Wang<sup>2\*</sup>

<sup>1</sup>*Institute of Functional Material Chemistry, Faculty of Chemistry, Northeast Normal University, Renmin Road 5268. Changchun, Jilin 130024, P. R. China*

<sup>2</sup>*College of Chemistry and Molecular Sciences, Wuhan University, Wuhan 430072, P. R. China*

---

<sup>1\*</sup> Corresponding author. Email address: [wangrs@nenu.edu.cn](mailto:wangrs@nenu.edu.cn) Tel.: 0431-85099511; Fax: 0431-85099511

<sup>2\*</sup> Corresponding author. Email address: [baoshan@whu.edu.cn](mailto:baoshan@whu.edu.cn)

**Fig. S1** Optimized geometries (length in Å and angle in degree) (a) for reactants and products, (b) for other intermediates and transition states. The geometries of 1-TS11 and 1-TS13 are obtained by BHandHLYP with 6-31+G(d,p) basis set. The experimental data are in bold.

(a)

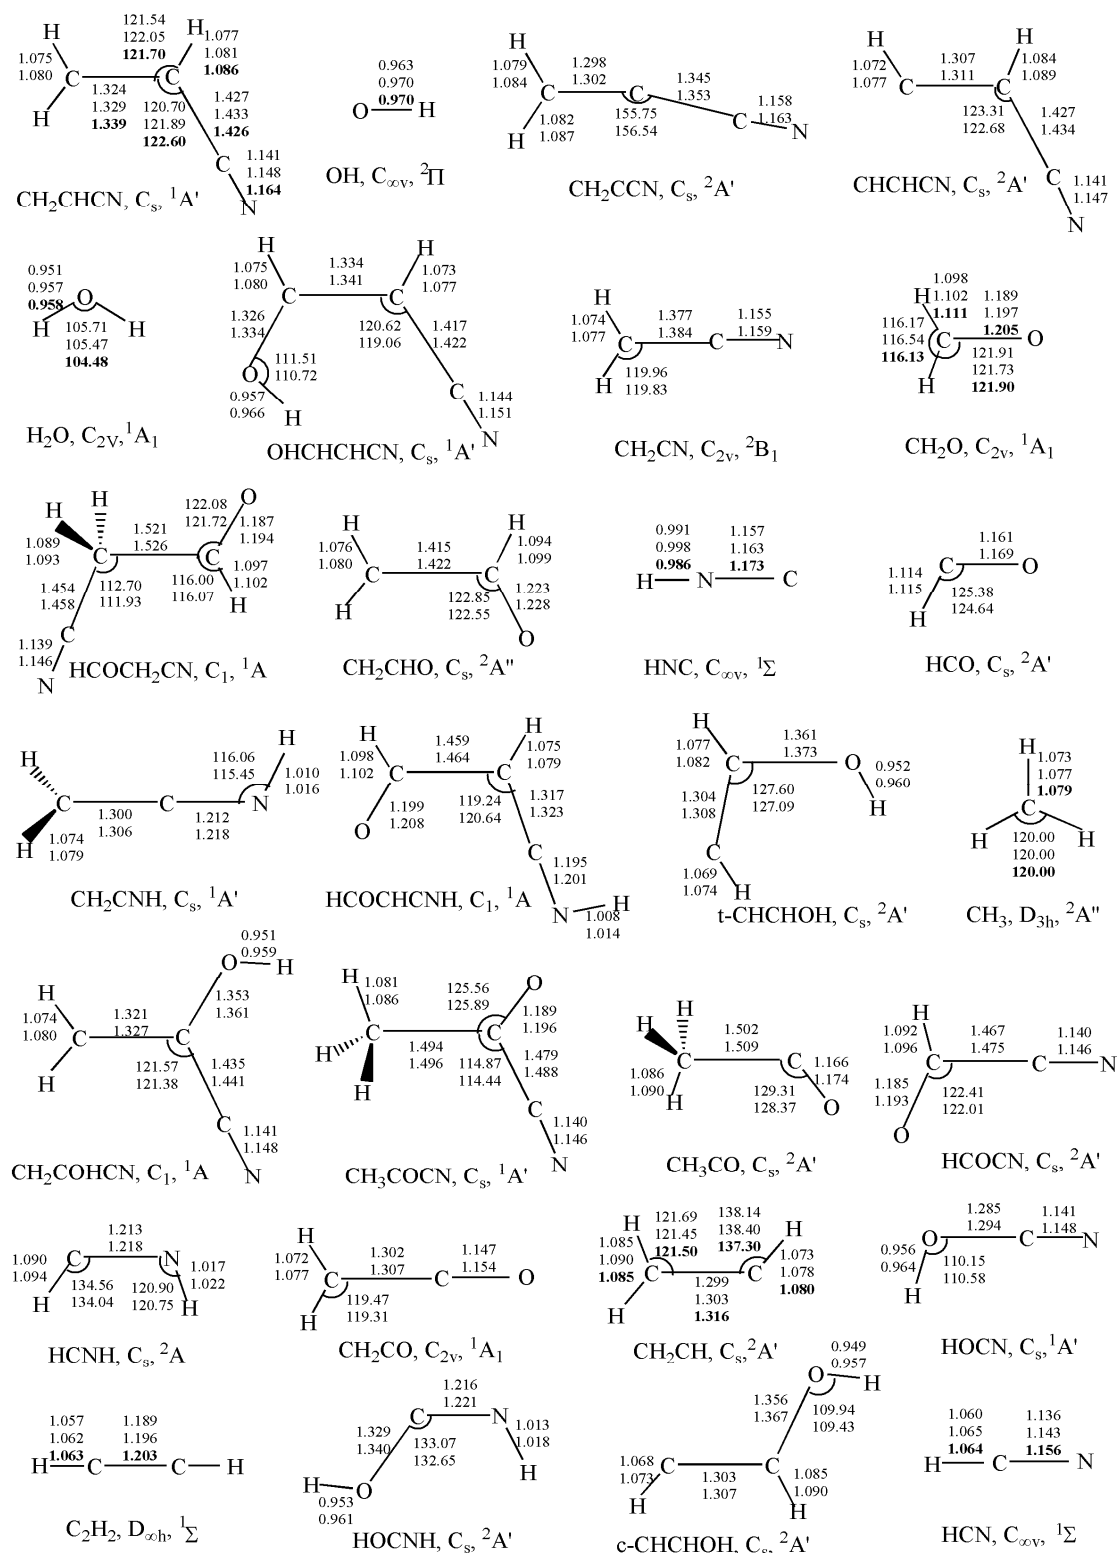

(b)

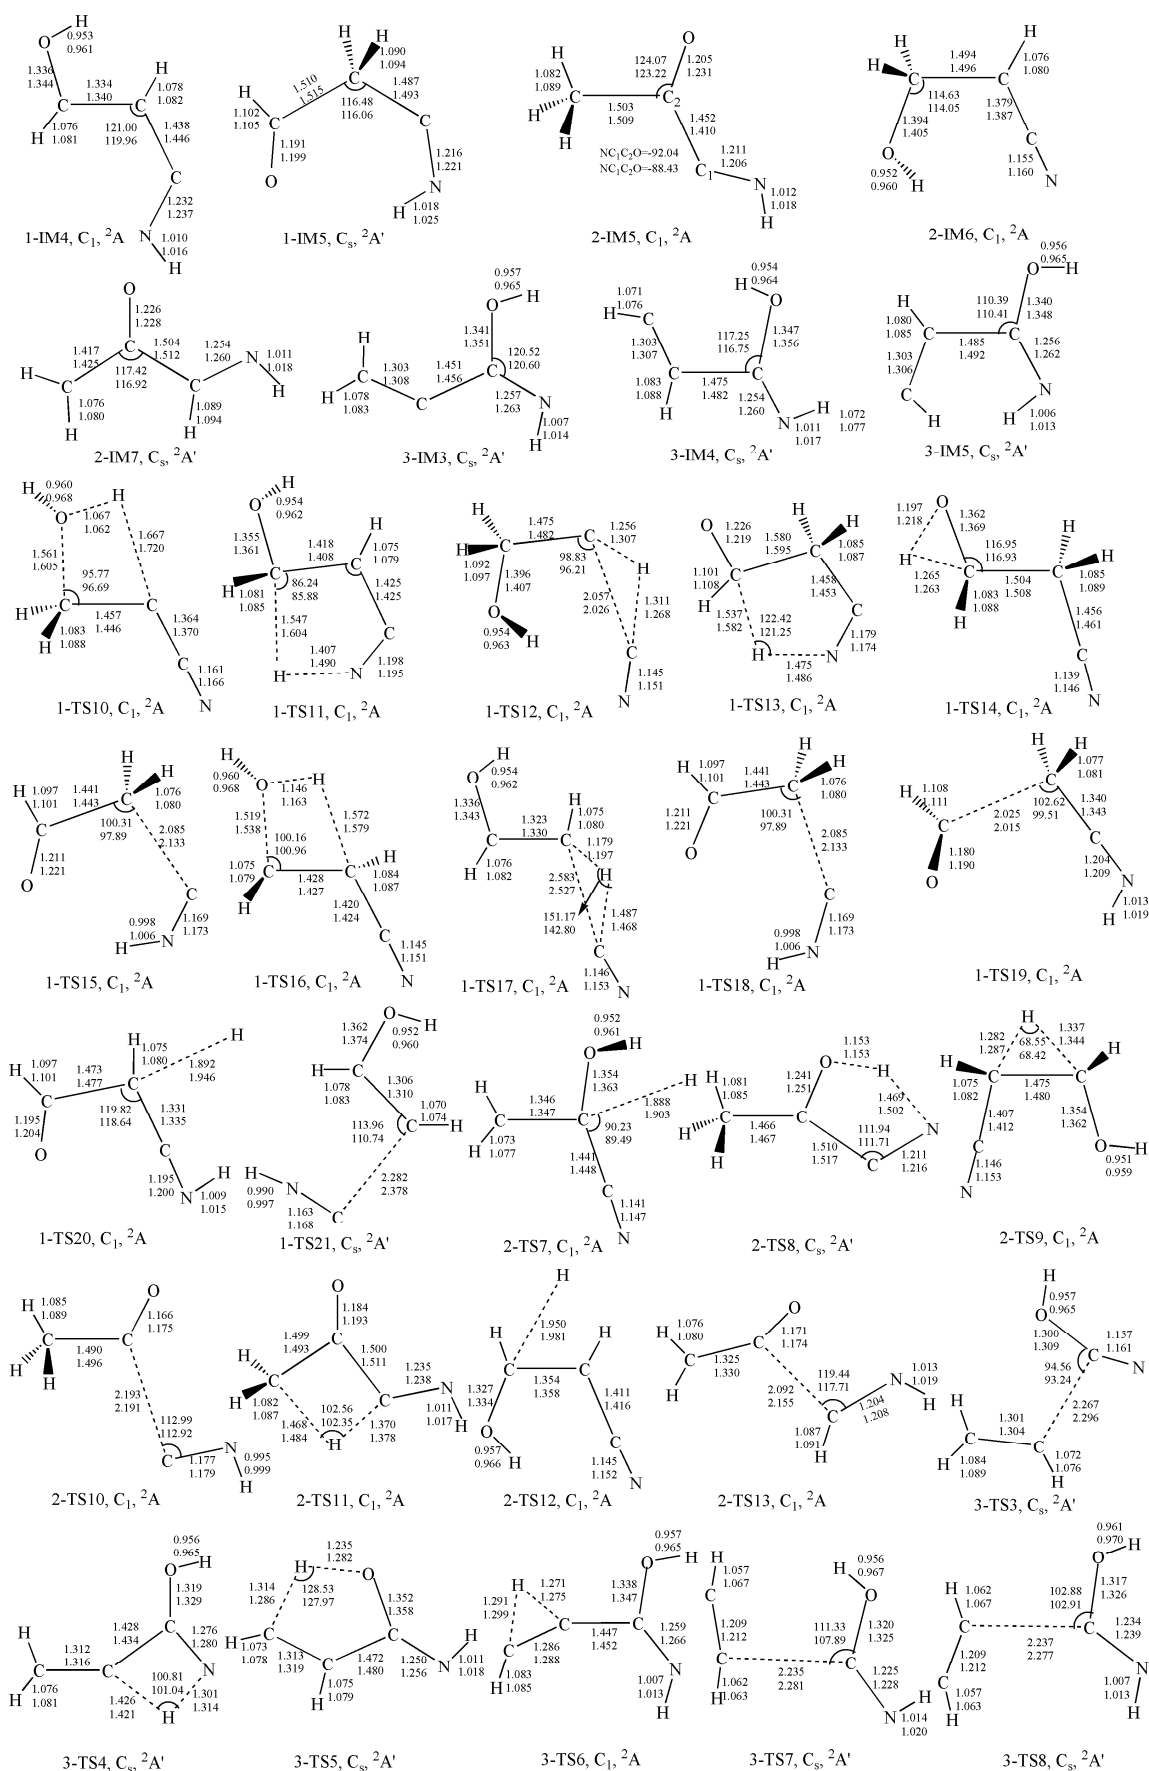

**Fig. S2** Other reaction pathways from (a) 1-IM1, (b) 2-IM1, and (c) 3-IM1 at the BMC-CCSD//BHandHLYP/6-311++G(d,p) level

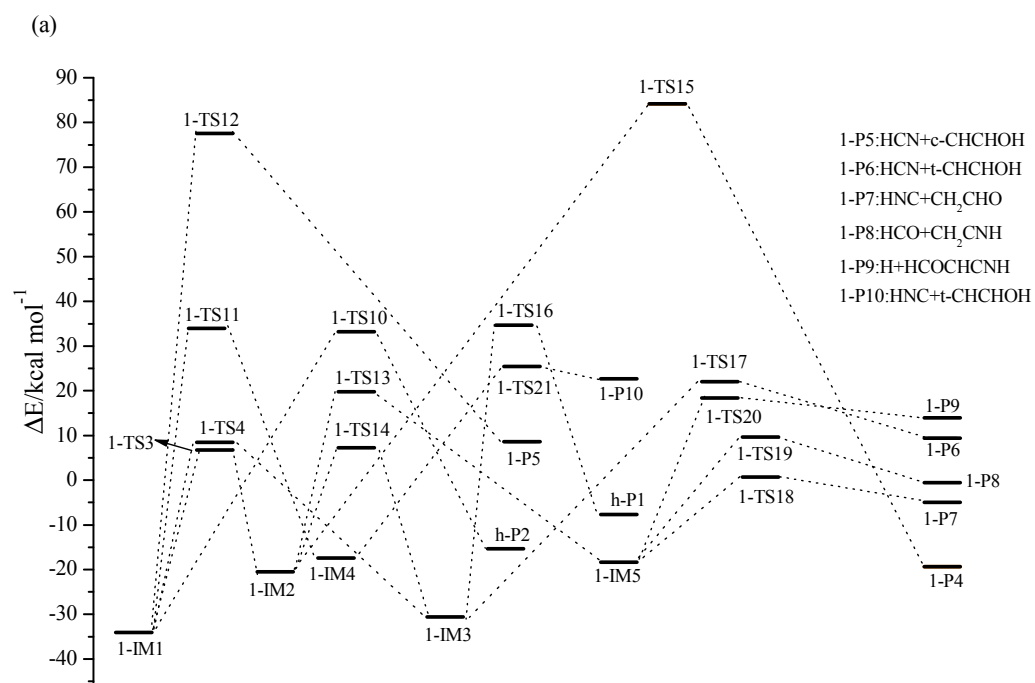

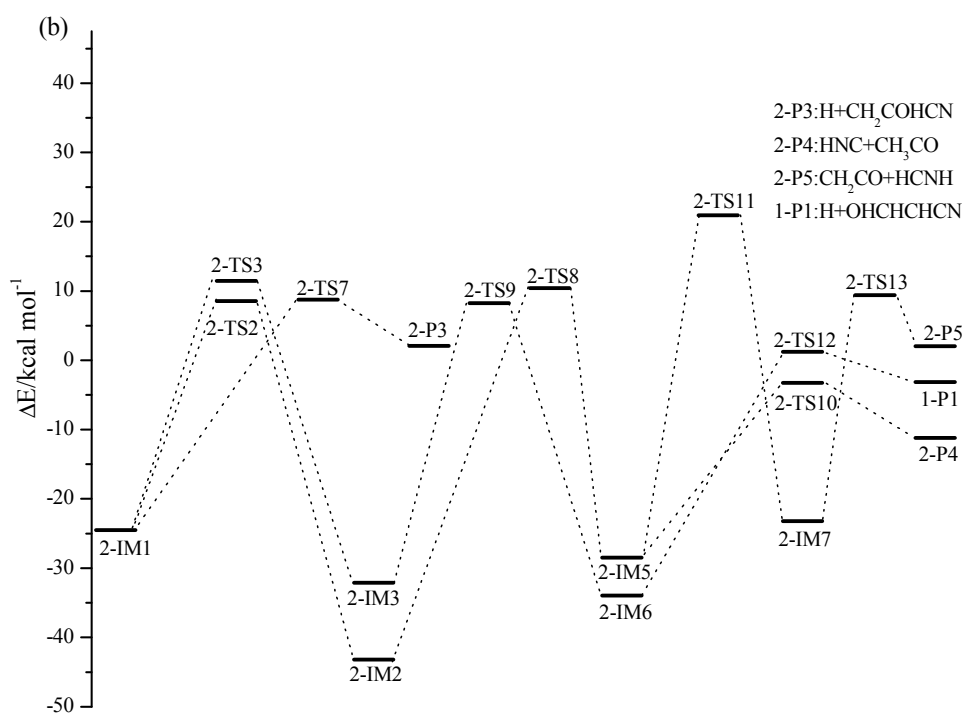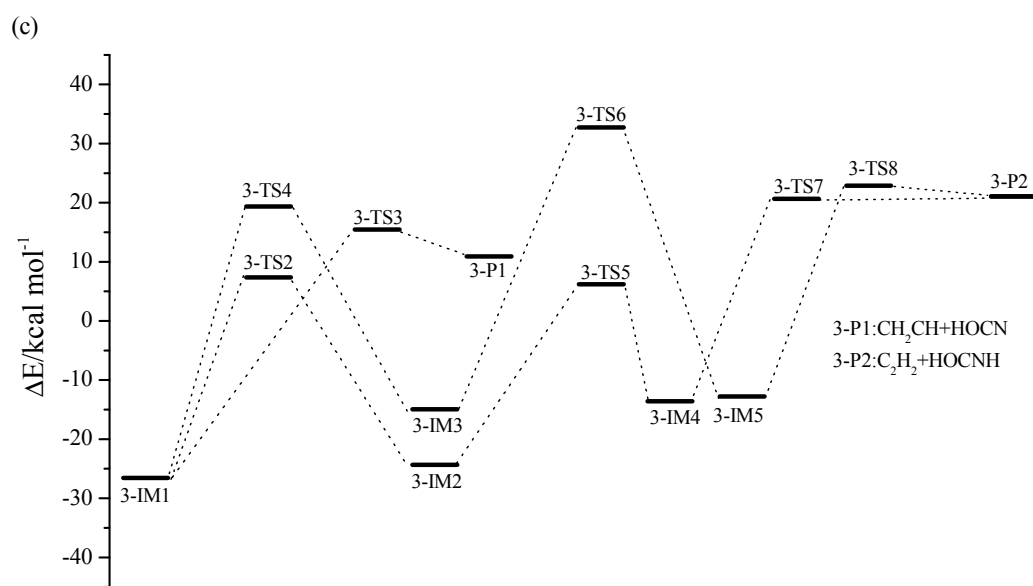

**Table S1** Relative Energies( $\Delta E$ ), Reaction Enthalpies( $\Delta H$ ), Gibbs Free Energies( $\Delta G$ ),  
 and Entropies( $\Delta S$ ) for various species in the OH + CH<sub>2</sub>=CHCN reaction

| species                                   | $\Delta E^a$ | $\Delta E^b$ | $\Delta H^c$ | $\Delta H^d$ | $\Delta G^e$ | $\Delta S^f$ | $\Delta S^g$ |
|-------------------------------------------|--------------|--------------|--------------|--------------|--------------|--------------|--------------|
| R:CH <sub>2</sub> =CHCN+OH                | 0.00         | 0.00         | 0.00         | 0.00         | 0.00         | 0.00         | 0.00         |
| 1-P1:H+OHCHCHCN                           | 6.18         | -3.37        | 6.03         | -3.51        | -0.53        | -9.15        | -9.67        |
| 1-P2:CH <sub>2</sub> CN+CH <sub>2</sub> O | -16.35       | -17.07       | -16.34       | -17.09       | -19.85       | 3.83         | 3.69         |
| 1-P3:H+HCOCH <sub>2</sub> CN              | 4.12         | -3.22        | 4.23         | -3.12        | -2.21        | -7.13        | -7.09        |
| 1-P4:HCN+CH <sub>2</sub> CHO              | -16.51       | -18.27       | -16.79       | -18.59       | -18.37       | 2.20         | 1.98         |
| 1-P5:HCN+c-CHCHOH                         | 16.70        | 12.94        | 16.69        | 12.84        | 11.35        | 3.72         | 2.98         |
| 1-P6:HCN+t-CHCHOH                         | 15.70        | 11.39        | 15.55        | 11.24        | 8.64         | 2.86         | 2.83         |
| 1-P7: HNC+CH <sub>2</sub> CHO             | -3.96        | -5.33        | -4.08        | -5.47        | -5.56        | 3.35         | 3.66         |
| 1-P8:HCO+CH <sub>2</sub> CNH              | 3.58         | 0.41         | 3.56         | 0.37         | -2.01        | 5.62         | 5.42         |
| 1-P9:H+HCOCHCNH                           | 20.15        | 12.42        | 20.11        | 12.39        | 16.71        | -8.77        | -8.92        |
| 1-P10:HNC+t-CHCHOH                        | 28.25        | 24.33        | 28.25        | 24.36        | 21.45        | 3.62         | 3.66         |
| h-P1:H <sub>2</sub> O+CHCHCN              | 0.22         | -3.54        | 0.59         | -3.25        | -8.48        | 2.46         | 3.44         |
| h-P2:H <sub>2</sub> O+CH <sub>2</sub> CCN | -8.30        | -11.54       | -7.74        | -10.98       | -15.99       | 2.81         | 4.66         |
| 2-P1:CH <sub>3</sub> +HCOCN               | -3.28        | -4.03        | -2.93        | -3.73        | -8.52        | 2.24         | 6.41         |
| 2-P2:H+CH <sub>3</sub> COCN               | 3.76         | -3.35        | 3.93         | -3.18        | -3.08        | -7.87        | -7.40        |
| 2-P3:H+CH <sub>2</sub> COHCN              | 13.09        | 4.21         | 13.26        | 4.23         | 4.92         | -8.05        | -8.98        |
| 2-P4: HNC+CH <sub>3</sub> CO              | -7.81        | -10.83       | -7.64        | -10.62       | -12.84       | 4.91         | 6.41         |
| 2-P5:CH <sub>2</sub> CO+HCNH              | 6.80         | 3.52         | 6.78         | 3.48         | 0.85         | 4.67         | 4.47         |
| 3-P1:CH <sub>2</sub> CH+HOCN              | 18.12        | 14.95        | 18.08        | 14.90        | 9.08         | 5.92         | 5.67         |
| 3-P2:C <sub>2</sub> H <sub>2</sub> +HOCNH | 28.31        | 23.45        | 28.23        | 23.36        | 20.54        | 1.84         | 1.50         |
| CR1                                       | -1.01        | -2.44        | -0.81        | -2.60        | 2.98         | -15.57       | -22.72       |
| 1-IM1                                     | -30.19       | -35.34       | -31.28       | -36.38       | -26.19       | -31.14       | -29.86       |
| 1-IM2                                     | -21.58       | -23.88       | -22.86       | -25.18       | -11.78       | -33.10       | -33.13       |
| 1-IM3                                     | -25.22       | -31.12       | -26.31       | -32.24       | -22.06       | -31.96       | -32.29       |
| 1-IM4                                     | -12.11       | -18.67       | -13.26       | -19.86       | -8.65        | -32.24       | -32.76       |
| 1-IM5                                     | -13.39       | -18.48       | -14.57       | -19.65       | -9.94        | -32.12       | -31.74       |

|        |        |        |        |        |        |        |        |
|--------|--------|--------|--------|--------|--------|--------|--------|
| 2-IM1  | -18.78 | -23.42 | -19.70 | -24.16 | -16.44 | -31.06 | -25.68 |
| 2-IM2  | -38.12 | -43.86 | -39.11 | -44.83 | -34.79 | -31.18 | -31.21 |
| 2-IM3  | -26.84 | -33.04 | -27.95 | -34.14 | -23.82 | -31.75 | -31.77 |
| 2-IM4  | -18.43 | -20.77 | -19.66 | -22.07 | -9.23  | -33.14 | -33.62 |
| 2-IM5  | -24.23 | -29.29 | -25.15 | -30.25 | -19.62 | -29.07 | -30.10 |
| 2-IM6  | -29.77 | -35.06 | -30.81 | -36.15 | -25.56 | -30.66 | -31.24 |
| 2-IM7  | -20.89 | -23.84 | -22.24 | -25.19 | -14.38 | -33.26 | -33.33 |
| 3-IM1  | -23.50 | -27.48 | -24.91 | -28.89 | -17.68 | -34.40 | -34.48 |
| 3-IM2  | -23.10 | -25.09 | -24.38 | -26.42 | -15.43 | -33.31 | -33.74 |
| 3-IM3  | -9.34  | -14.92 | -10.59 | -16.14 | -6.62  | -32.73 | -32.35 |
| 3-IM4  | -6.83  | -13.11 | -8.19  | -14.47 | -4.82  | -34.28 | -34.36 |
| 3-IM5  | -6.67  | -12.86 | -8.02  | -14.21 | -4.52  | -32.45 | -32.49 |
| 1-TS1  | 1.01   | -1.54  | 0.15   | -2.45  | 6.73   | -29.45 | -29.95 |
| 1-TS2  | 12.07  | 6.40   | 10.97  | 5.30   | 11.97  | -33.00 | -33.02 |
| 1-TS3  | 13.91  | 6.61   | 12.32  | 5.02   | 16.31  | -35.17 | -35.20 |
| 1-TS4  | 16.34  | 7.75   | 15.18  | 6.63   | 16.90  | -32.83 | -32.48 |
| 1-TS5  | -2.21  | -7.35  | -3.31  | -8.47  | 1.05   | -31.01 | -31.36 |
| 1-TS6  | 9.01   | 4.42   | 7.93   | 3.37   | 8.64   | -31.85 | -31.72 |
| 1-TS7  | 11.99  | 5.92   | 10.89  | 4.84   | 12.32  | -32.97 | -32.86 |
| 1-TS8  | 12.86  | 8.80   | 11.96  | 7.93   | 17.76  | -29.94 | -29.72 |
| 1-TS9  | 21.54  | —      | 20.40  | —      | —      | -31.43 | —      |
| 1-TS10 | 39.62  | 31.32  | 38.31  | 30.12  | 41.41  | -33.13 | -32.05 |
| 1-TS11 | 82.16  | 71.56  | 80.67  | 70.20  | 42.35  | -35.42 | -34.27 |
| 1-TS12 | 84.77  | 77.15  | 84.11  | 76.37  | 86.89  | -28.50 | -29.75 |
| 1-TS13 | 66.60  | 20.97  | 65.14  | 19.46  | 28.99  | -34.46 | -35.06 |
| 1-TS14 | 14.44  | 5.97   | 13.14  | 4.68   | 19.82  | -32.99 | -32.85 |
| 1-TS15 | 86.97  | 84.11  | 86.07  | 83.19  | 96.39  | -29.48 | -29.68 |
| 1-TS16 | 43.22  | 32.26  | 41.84  | 30.88  | 43.35  | -34.21 | -34.20 |
| 1-TS17 | 33.32  | 25.80  | 32.79  | 25.26  | 34.70  | -25.79 | -25.83 |
| 1-TS18 | 5.51   | -1.37  | 4.65   | -2.31  | 9.37   | -29.85 | -30.96 |

|        |       |       |       |       |       |        |        |
|--------|-------|-------|-------|-------|-------|--------|--------|
| 1-TS19 | 15.84 | 8.06  | 14.86 | 7.04  | 17.89 | -29.93 | -30.35 |
| 1-TS20 | 24.00 | 18.72 | 22.91 | 17.67 | 26.87 | -32.43 | -32.16 |
| 1-TS21 | 32.64 | 25.49 | 32.33 | 25.18 | 32.34 | -24.71 | -24.46 |
| 2-TS1  | 4.97  | 1.16  | 3.97  | 0.21  | 8.87  | -31.29 | -30.85 |
| 2-TS2  | 17.20 | 8.82  | 15.94 | 7.61  | 17.17 | -33.76 | -33.47 |
| 2-TS3  | 20.68 | 11.22 | 19.89 | 10.23 | 19.59 | -27.52 | -30.55 |
| 2-TS4  | 16.32 | 8.19  | 14.74 | 6.63  | 17.31 | -35.54 | -35.43 |
| 2-TS5  | 3.00  | -3.35 | 2.13  | -4.09 | 4.00  | -30.13 | -27.88 |
| 2-TS6  | 11.22 | 6.61  | 10.13 | 5.60  | 9.99  | -32.50 | -31.83 |
| 2-TS7  | 19.34 | 13.43 | 18.17 | 12.25 | 17.55 | -33.41 | -33.59 |
| 2-TS8  | 19.44 | 9.96  | 18.09 | 8.66  | 18.79 | -33.29 | -32.97 |
| 2-TS9  | 16.18 | 7.76  | 14.87 | 6.45  | 16.94 | -33.54 | -33.64 |
| 2-TS10 | 0.96  | -5.52 | 0.74  | -5.63 | 3.22  | -22.74 | -22.23 |
| 2-TS11 | 29.02 | 22.01 | 27.66 | 20.62 | 29.76 | -33.83 | -34.14 |
| 2-TS12 | 9.97  | 3.70  | 8.78  | 2.53  | 9.64  | -33.14 | -33.06 |
| 2-TS13 | 17.59 | 9.16  | 16.71 | 8.35  | 17.37 | -29.78 | -29.41 |
| 3-TS1  | 6.29  | 3.13  | 5.32  | 2.24  | 9.30  | -30.62 | -28.68 |
| 3-TS2  | 16.52 | 8.94  | 14.95 | 7.37  | 16.41 | -35.19 | -35.21 |
| 3-TS3  | 25.26 | 17.69 | 24.65 | 17.23 | 22.24 | -27.77 | -25.44 |
| 3-TS4  | 29.75 | 22.05 | 28.26 | 20.57 | 28.52 | -35.01 | -34.98 |
| 3-TS5  | 15.58 | 7.50  | 13.70 | 5.64  | 15.79 | -37.76 | -37.75 |
| 3-TS6  | 41.22 | 32.72 | 40.11 | 31.68 | 40.60 | -32.29 | -31.64 |
| 3-TS7  | 30.89 | 22.68 | 30.23 | 22.10 | 27.66 | -27.56 | -26.22 |
| 3-TS8  | 33.19 | 24.59 | 32.52 | 23.93 | 30.38 | -28.40 | -28.17 |
| h-TS1  | 11.58 | 6.09  | 10.86 | 5.29  | 12.05 | -28.32 | -29.34 |
| h-TS2  | 9.83  | 5.59  | 9.17  | 4.84  | 11.23 | -27.78 | -28.46 |

---

Except  $\Delta S$ , the energies are given in kcal/mol.  $\Delta S$  is given in cal mol<sup>-1</sup>K<sup>-1</sup>.  
<sup>a</sup>BHandHLYP/6-311++G(d,p); <sup>b</sup>M05-2X/6-311++G(d,p); <sup>c</sup>BHandHLYP/6-311++G(d,p); <sup>d</sup>M05-2X/6-311++G(d,p); <sup>e</sup>BMC-CCSD//M05-2X; <sup>f</sup>BMC-CCSD//BHandHLYP; <sup>g</sup>BMC-CCSD//M05-2X.



**Table S2** The moment of inertia ( $I_a$ ,  $I_b$  and  $I_c$ ), rotational symmetry number, and optical isomers number of the major species.

| species               | $I_a, I_b, I_c$<br>(amu bohr <sup>2</sup> ) | $N_{\text{rotational symmetry}}$ | $N_{\text{optical isomers}}$ |
|-----------------------|---------------------------------------------|----------------------------------|------------------------------|
| CH <sub>2</sub> =CHCN | 35.06430, 358.37170, 393.43599              | 1                                | 1                            |
| OH                    | 0.00000, 3.14106, 3.14106                   | 1                                | 1                            |
| OHCHCHCN              | 133.43620, 479.70426, 613.14046             | 1                                | 1                            |
| CH <sub>2</sub> CN    | 6.22732, 172.76173, 178.98905               | 2                                | 1                            |
| CH <sub>2</sub> O     | 6.24984, 45.26714, 51.51699                 | 2                                | 1                            |
| HCOCH <sub>2</sub> CN | 65.99964, 693.54258, 735.16211              | 1                                | 1                            |
| CH <sub>2</sub> CCN   | 9.24535, 404.29671, 413.54206               | 1                                | 1                            |
| CHCHCN                | 26.88727, 351.20175, 378.08903              | 1                                | 1                            |
| H <sub>2</sub> O      | 2.10612, 4.13283, 6.23894                   | 2                                | 1                            |
| HCN                   | 0.00000, 39.47944, 39.47944                 | 1                                | 1                            |
| CH <sub>2</sub> CHO   | 26.46461, 154.96262, 181.42723              | 1                                | 1                            |
| CH <sub>3</sub>       | 6.21535, 6.21535, 12.43071                  | 6                                | 1                            |
| HCOCN                 | 26.01984, 354.12103, 380.14087              | 1                                | 1                            |
| CH <sub>3</sub> COCN  | 174.31300, 427.27655, 590.56403             | 1                                | 1                            |
| CR1                   | 199.26208, 788.88597, 928.64920             | 1                                | 1                            |
| 1-IM1                 | 66.19537, 765.30966, 781.14651              | 1                                | 1                            |
| 1-IM2                 | 65.14201, 740.25202, 783.50335              | 1                                | 1                            |
| 1-IM3                 | 59.79830, 758.00906, 801.84974              | 1                                | 1                            |
| 2-IM1                 | 192.05053, 434.45896, 584.11564             | 1                                | 1                            |
| 2-IM2                 | 186.15571, 442.98593, 618.04491             | 1                                | 1                            |
| 2-IM3                 | 134.51797, 582.06221, 659.01650             | 1                                | 1                            |
| 2-IM4                 | 188.18104, 443.89373, 586.86790             | 1                                | 1                            |
| 3-IM1                 | 166.33665, 392.99720, 559.33385             | 1                                | 1                            |
| 3-IM2                 | 154.49832, 418.57302, 572.28719             | 1                                | 1                            |
| 1-TS1                 | 161.82507, 667.78341, 761.36676             | 1                                | 1                            |
| 1-TS2                 | 55.53482, 763.79125, 794.02637              | 1                                | 1                            |

|       |                                 |   |   |
|-------|---------------------------------|---|---|
| 1-TS3 | 103.78997, 624.99686, 642.14278 | 1 | 1 |
| 1-TS4 | 57.66140, 773.27460, 799.14553  | 1 | 1 |
| 1-TS5 | 93.07888, 749.79156, 818.59525  | 1 | 1 |
| 1-TS6 | 73.57553, 716.57638, 759.96671  | 1 | 1 |
| 1-TS7 | 58.53305, 756.00671, 791.86439  | 1 | 1 |
| 1-TS8 | 63.16001, 746.06937, 788.13540  | 1 | 1 |
| 1-TS9 | 163.18925, 540.62970, 675.51110 | 1 | 1 |
| 2-TS1 | 232.06736, 460.55287, 629.85507 | 1 | 1 |
| 2-TS2 | 185.02172, 439.81651, 610.86100 | 1 | 1 |
| 2-TS3 | 206.00448, 526.78960, 681.22082 | 1 | 1 |
| 2-TS4 | 153.11066, 476.02232, 570.47867 | 1 | 1 |
| 2-TS5 | 251.30210, 444.88315, 641.52183 | 1 | 1 |
| 2-TS6 | 189.03212, 443.64769, 594.97229 | 1 | 1 |
| 3-TS1 | 211.31126, 404.46421, 615.77546 | 1 | 1 |
| 3-TS2 | 189.78707, 508.43298, 698.22004 | 1 | 1 |
| h-TS1 | 266.30909, 517.09646, 783.40555 | 1 | 1 |
| h-TS2 | 275.98873, 564.15802, 835.24066 | 1 | 1 |

**Table S3** The Z-matrix (Cartesian coordinates) of the major species.

| Species | Coordinates(Atom, X, Y, Z) |           |           |           |
|---------|----------------------------|-----------|-----------|-----------|
| CR1     | C                          | -0.442955 | 1.315239  | -0.220768 |
|         | H                          | -1.373942 | 1.732733  | 0.117047  |
|         | H                          | -0.043592 | 1.666370  | -1.156319 |
|         | C                          | 0.181645  | 0.395609  | 0.500827  |
|         | H                          | -0.221477 | 0.046745  | 1.435732  |
|         | C                          | 1.413421  | -0.195859 | 0.090184  |
|         | N                          | 2.394445  | -0.687040 | -0.225652 |
|         | O                          | -2.492892 | -0.792380 | -0.044028 |
|         | H                          | -2.091630 | -1.387460 | -0.686131 |
| 1-IM1   | C                          | 0.991566  | -0.458476 | 0.282737  |
|         | H                          | 0.710342  | -1.383537 | -0.215859 |
|         | H                          | 1.236792  | -0.706650 | 1.312763  |
|         | C                          | -0.147255 | 0.508328  | 0.261866  |
|         | H                          | 0.046459  | 1.539562  | 0.502308  |
|         | C                          | -1.446672 | 0.121451  | 0.000233  |
|         | N                          | -2.527590 | -0.215735 | -0.226241 |
|         | O                          | 2.159847  | 0.097285  | -0.261624 |
|         | H                          | 2.034923  | 0.254663  | -1.191550 |
| 1-IM2   | C                          | 0.949031  | -0.544212 | 0.000000  |
|         | H                          | 0.775063  | -1.186110 | 0.868254  |
|         | H                          | 0.775063  | -1.186110 | -0.868254 |
|         | C                          | 0.000000  | 0.657418  | 0.000000  |
|         | H                          | 0.186828  | 1.270698  | -0.875637 |
|         | C                          | -1.395163 | 0.242888  | 0.000000  |
|         | N                          | -2.477019 | -0.114969 | 0.000000  |
|         | O                          | 2.261518  | -0.187620 | 0.000000  |
|         | H                          | 0.186828  | 1.270698  | 0.875637  |
| 1-IM3   | C                          | -0.935705 | -0.479288 | -0.030383 |
|         | H                          | -0.765612 | -1.437595 | 0.424974  |
|         | H                          | -0.007325 | 1.118819  | 1.067456  |
|         | C                          | 0.085006  | 0.606652  | 0.106006  |
|         | H                          | -0.053733 | 1.365096  | -0.664258 |
|         | C                          | 1.444596  | 0.096868  | -0.004624 |
|         | N                          | 2.507580  | -0.304551 | -0.083167 |
|         | O                          | -2.239216 | -0.119302 | -0.021860 |
|         | H                          | -2.376051 | 0.694556  | -0.497115 |
| 2-IM1   | C                          | -1.086521 | 1.208708  | -0.140969 |
|         | H                          | -2.158823 | 1.254191  | -0.082076 |
|         | H                          | -0.525343 | 2.067108  | -0.458691 |
|         | C                          | -0.415315 | -0.016379 | 0.373653  |
|         | H                          | -0.524040 | -0.075932 | 1.455505  |

|       |   |           |           |           |
|-------|---|-----------|-----------|-----------|
|       | C | 1.032445  | 0.015072  | 0.092353  |
|       | N | 2.147184  | 0.045510  | -0.139816 |
|       | O | -1.000818 | -1.202025 | -0.103720 |
|       | H | -0.999192 | -1.192143 | -1.056488 |
| 2-IM2 | C | -1.255900 | 1.116243  | 0.000000  |
|       | H | -1.301558 | 1.756766  | 0.877962  |
|       | H | -2.116294 | 0.459910  | 0.000000  |
|       | C | 0.000000  | 0.334228  | 0.000000  |
|       | H | -1.301558 | 1.756766  | -0.877962 |
|       | C | 0.063237  | -1.048011 | 0.000000  |
|       | N | 0.129497  | -2.201276 | 0.000000  |
|       | O | 1.132940  | 1.064325  | 0.000000  |
|       | H | 1.905384  | 0.506126  | 0.000000  |
| 2-IM3 | C | -0.112347 | 0.895044  | -0.219243 |
|       | H | -0.350363 | 1.863831  | 0.208553  |
|       | H | 0.056840  | 1.035744  | -1.283051 |
|       | C | 1.119559  | 0.349860  | 0.415871  |
|       | H | 1.213113  | 0.332810  | 1.489923  |
|       | C | -1.280364 | 0.025369  | -0.048892 |
|       | N | -2.180814 | -0.655909 | 0.107516  |
|       | O | 1.698308  | -0.651005 | -0.283941 |
|       | H | 2.398562  | -1.054617 | 0.217075  |
| 2-IM4 | C | 1.202712  | -1.049088 | -0.119955 |
|       | H | 2.239310  | -0.912252 | 0.160477  |
|       | H | 0.814885  | -1.949426 | 0.341854  |
|       | C | 0.389496  | 0.161707  | 0.353680  |
|       | H | 0.515168  | 0.256601  | 1.434906  |
|       | C | -1.051220 | -0.018072 | 0.077276  |
|       | N | -2.160234 | -0.169908 | -0.132711 |
|       | O | 0.896983  | 1.296913  | -0.209767 |
|       | H | 1.130486  | -1.148155 | -1.196125 |
| 3-IM1 | C | -0.318212 | -1.841882 | 0.000000  |
|       | H | -0.959636 | -2.705664 | 0.000000  |
|       | H | 0.744614  | -2.006736 | 0.000000  |
|       | C | -0.827348 | -0.621645 | 0.000000  |
|       | H | -1.888818 | -0.447520 | 0.000000  |
|       | C | 0.000000  | 0.588221  | 0.000000  |
|       | N | -0.494186 | 1.741511  | 0.000000  |
|       | O | 1.331353  | 0.375746  | 0.000000  |
|       | H | 1.785682  | 1.215220  | 0.000000  |
| 3-IM2 | C | 1.930427  | 0.054282  | 0.025538  |
|       | H | 2.886447  | -0.439107 | 0.014078  |
|       | H | 1.918502  | 1.130076  | 0.072615  |
|       | C | 0.800330  | -0.631626 | -0.020031 |

|       |   |           |           |           |
|-------|---|-----------|-----------|-----------|
|       | H | 0.784668  | -1.706692 | -0.064420 |
|       | C | -0.511935 | 0.042510  | 0.003693  |
|       | N | -1.609736 | -0.792728 | -0.015974 |
|       | O | -0.652752 | 1.251620  | -0.029467 |
|       | H | -2.412384 | -0.239136 | 0.270080  |
| 1-TS1 | C | -0.861759 | 0.858411  | -0.417881 |
|       | H | -0.771896 | 0.588919  | -1.453531 |
|       | H | -1.706890 | 1.453483  | -0.131294 |
|       | C | 0.158815  | 0.671575  | 0.446409  |
|       | H | 0.091661  | 1.005276  | 1.467171  |
|       | C | 1.348852  | -0.008997 | 0.081743  |
|       | N | 2.311008  | -0.560801 | -0.196350 |
|       | O | -2.036835 | -0.840909 | 0.077591  |
|       | H | -1.370702 | -1.520739 | 0.209747  |
| 1-TS2 | C | -0.912871 | -0.349049 | -0.107884 |
|       | H | -0.736326 | -1.346285 | -0.467753 |
|       | H | -0.792922 | -1.205225 | 1.635627  |
|       | C | 0.099443  | 0.525183  | 0.086430  |
|       | H | -0.089662 | 1.549428  | 0.360824  |
|       | C | 1.447688  | 0.116730  | -0.005702 |
|       | N | 2.544695  | -0.198141 | -0.078072 |
|       | O | -2.206294 | -0.029123 | -0.124228 |
|       | H | -2.349167 | 0.864866  | 0.174563  |
| 1-TS3 | C | 1.137251  | 0.558039  | -0.388152 |
|       | H | 0.838911  | 0.606747  | -1.427516 |
|       | H | 1.784479  | 1.384554  | -0.124386 |
|       | C | 0.023282  | 0.293458  | 0.580359  |
|       | H | 0.083947  | 0.769216  | 1.545549  |
|       | C | -1.286675 | 0.019463  | 0.097145  |
|       | N | -2.335469 | -0.214475 | -0.292135 |
|       | O | 1.710414  | -0.704833 | -0.049435 |
|       | H | 0.714478  | -0.846288 | 0.710660  |
| 1-TS4 | C | -0.993562 | -0.438792 | 0.196159  |
|       | H | -0.777612 | -1.491447 | 0.154727  |
|       | H | -0.408865 | 0.096450  | 1.271966  |
|       | C | 0.128153  | 0.524011  | 0.197431  |
|       | H | -0.110047 | 1.570356  | 0.124401  |
|       | C | 1.455271  | 0.113318  | -0.033576 |
|       | N | 2.534443  | -0.241013 | -0.187439 |
|       | O | -2.226798 | -0.033623 | -0.186421 |
|       | H | -2.169362 | 0.589494  | -0.907739 |
| 1-TS5 | C | 1.010627  | -0.912697 | 0.000000  |
|       | H | 0.550855  | -1.268586 | 0.924178  |
|       | H | 0.550855  | -1.268586 | -0.924178 |

|       |   |           |           |           |
|-------|---|-----------|-----------|-----------|
|       | C | 0.000000  | 0.875436  | 0.000000  |
|       | H | 0.385826  | 1.294504  | -0.912215 |
|       | C | -1.363163 | 0.511929  | 0.000000  |
|       | N | -2.455401 | 0.165827  | 0.000000  |
|       | O | 2.178708  | -0.507579 | 0.000000  |
|       | H | 0.385826  | 1.294504  | 0.912215  |
| 1-TS6 | C | -1.056559 | -0.311054 | -0.219855 |
|       | H | -0.793159 | -1.159315 | -0.862599 |
|       | H | -0.621196 | -1.498073 | 1.132377  |
|       | C | 0.051036  | 0.703258  | 0.041590  |
|       | H | -0.129614 | 1.199996  | 0.987818  |
|       | C | 1.382016  | 0.120267  | 0.015804  |
|       | N | 2.414766  | -0.359573 | -0.012264 |
|       | O | -2.199996 | -0.069642 | 0.067986  |
|       | H | -0.018386 | 1.456709  | -0.740867 |
| 1-TS7 | C | -0.929533 | -0.405892 | 0.094291  |
|       | H | -0.742961 | -1.397932 | 0.463252  |
|       | H | 0.108313  | 1.583556  | 1.457167  |
|       | C | 0.065239  | 0.479040  | -0.125616 |
|       | H | -0.124297 | 1.417803  | -0.617446 |
|       | C | 1.422009  | 0.055942  | -0.059157 |
|       | N | 2.513618  | -0.275520 | -0.016708 |
|       | O | -2.225397 | -0.149058 | -0.038073 |
|       | H | -2.379493 | 0.743136  | -0.338537 |
| 1-TS8 | C | 0.970603  | -0.430215 | 0.035182  |
|       | H | 0.674260  | -1.434530 | 0.338818  |
|       | H | 0.060303  | 1.258810  | -0.893076 |
|       | C | -0.091113 | 0.640372  | -0.013697 |
|       | H | 0.046783  | 1.287906  | 0.853523  |
|       | C | -1.444287 | 0.108701  | -0.001412 |
|       | N | -2.495578 | -0.329124 | 0.009626  |
|       | O | 2.137633  | -0.153039 | -0.175805 |
|       | H | 2.975417  | 0.502848  | 0.919360  |
| 1-TS9 | C | -1.354634 | 0.241487  | -0.221348 |
|       | H | -2.174939 | 0.536720  | -0.861162 |
|       | H | 0.005025  | 1.122492  | 1.191650  |
|       | C | -0.383233 | 1.154766  | 0.192624  |
|       | H | -0.240354 | 2.065329  | -0.362043 |
|       | C | 1.230575  | -0.450691 | 0.055368  |
|       | N | 2.296640  | -0.056352 | -0.166348 |
|       | O | -1.293738 | -0.986086 | 0.094775  |
|       | H | -0.272553 | -1.114763 | 0.277922  |
| 2-TS1 | C | 1.019395  | -1.242198 | -0.223139 |
|       | H | 1.987171  | -1.543673 | 0.132417  |

|       |   |           |           |           |
|-------|---|-----------|-----------|-----------|
|       | H | 0.683053  | -1.614913 | -1.174272 |
|       | C | 0.282496  | -0.344147 | 0.486577  |
|       | H | 0.545130  | -0.099414 | 1.498702  |
|       | C | -1.072087 | -0.062619 | 0.114944  |
|       | N | -2.155249 | 0.143348  | -0.176743 |
|       | O | 1.175255  | 1.353789  | -0.059372 |
|       | H | 1.090518  | 1.318037  | -1.014969 |
| 2-TS2 | C | 1.216000  | -1.158494 | -0.062690 |
|       | H | 2.267807  | -0.983997 | -0.171605 |
|       | H | 0.767812  | -2.104872 | -0.291774 |
|       | C | 0.366009  | 0.025871  | 0.121342  |
|       | H | 0.785883  | -0.647963 | 1.109954  |
|       | C | -1.045633 | -0.063475 | -0.005526 |
|       | N | -2.189170 | -0.118686 | -0.044702 |
|       | O | 0.969852  | 1.227524  | -0.125203 |
|       | H | 0.525618  | 1.924033  | 0.349206  |
| 2-TS3 | C | -1.021936 | 1.207898  | -0.104883 |
|       | H | -1.349757 | 1.325311  | -1.121260 |
|       | H | -0.818192 | 2.073664  | 0.493714  |
|       | C | -0.845209 | -0.027240 | 0.424225  |
|       | H | -0.518963 | -0.156922 | 1.442366  |
|       | C | 1.384961  | 0.432484  | -0.159092 |
|       | N | 2.250824  | -0.307535 | 0.014023  |
|       | O | -1.170598 | -1.109224 | -0.253125 |
|       | H | -0.810968 | -1.894366 | 0.150518  |
| 2-TS4 | C | -1.211718 | 0.960576  | -0.126623 |
|       | H | -1.971982 | 1.381266  | 0.509236  |
|       | H | -0.825988 | 1.567290  | -0.928357 |
|       | C | -0.306636 | -0.070011 | 0.471560  |
|       | H | -0.383755 | -0.188581 | 1.545873  |
|       | C | 1.102626  | 0.017750  | 0.093708  |
|       | N | 2.204446  | 0.102380  | -0.182404 |
|       | O | -1.006019 | -1.093810 | -0.225391 |
|       | H | -1.706877 | -0.176046 | -0.678663 |
| 2-TS5 | C | -1.387507 | 1.271447  | -0.094620 |
|       | H | -2.366911 | 0.915881  | 0.170059  |
|       | H | -0.910635 | 1.977426  | 0.563490  |
|       | C | -0.255299 | -0.554486 | 0.409156  |
|       | H | -0.552238 | -0.397773 | 1.445344  |
|       | C | 1.063440  | 0.002000  | 0.079671  |
|       | N | 2.095455  | 0.431136  | -0.144593 |
|       | O | -0.777017 | -1.393806 | -0.298900 |
|       | H | -1.146071 | 1.323201  | -1.140786 |
| 2-TS6 | C | 1.247623  | -1.048246 | -0.061594 |

|       |   |           |           |           |
|-------|---|-----------|-----------|-----------|
|       | H | 2.270362  | -0.819964 | 0.207212  |
|       | H | 0.857713  | -1.847020 | 0.557228  |
|       | C | 0.413650  | 0.199643  | 0.040018  |
|       | H | 0.387378  | 0.246320  | 1.837364  |
|       | C | -1.048402 | -0.021695 | 0.001113  |
|       | N | -2.169440 | -0.218132 | -0.057591 |
|       | O | 0.846858  | 1.318491  | -0.122278 |
|       | H | 1.218543  | -1.378551 | -1.097666 |
| 3-TS1 | C | -1.133561 | -1.444430 | 0.000000  |
|       | H | -2.055829 | -1.998089 | 0.000000  |
|       | H | -0.208941 | -1.989322 | 0.000000  |
|       | C | -1.159257 | -0.123459 | 0.000000  |
|       | H | -2.086877 | 0.423632  | 0.000000  |
|       | C | 0.000000  | 0.728302  | 0.000000  |
|       | N | 0.544366  | 1.759854  | 0.000000  |
|       | O | 1.507186  | -0.481983 | 0.000000  |
|       | H | 2.240503  | 0.138188  | 0.000000  |
| 3-TS2 | C | 0.081101  | -2.068126 | 0.000000  |
|       | H | -0.245759 | -3.101267 | 0.000000  |
|       | H | 1.144512  | -1.890894 | 0.000000  |
|       | C | -0.782173 | -1.095446 | 0.000000  |
|       | H | -1.849986 | -1.003913 | 0.000000  |
|       | C | 0.000000  | 1.032805  | 0.000000  |
|       | N | -0.950700 | 1.692540  | 0.000000  |
|       | O | 1.251914  | 0.682921  | 0.000000  |
|       | H | 1.797243  | 1.469524  | 0.000000  |
| h-TS1 | C | -1.206945 | 0.714883  | 0.000000  |
|       | H | -2.147953 | 1.236585  | 0.000000  |
|       | H | -1.367948 | -0.566752 | 0.000000  |
|       | C | 0.000000  | 1.238158  | 0.000000  |
|       | H | 0.145935  | 2.307871  | 0.000000  |
|       | C | 1.177812  | 0.434789  | 0.000000  |
|       | N | 2.116639  | -0.214333 | 0.000000  |
|       | O | -1.356923 | -1.734763 | 0.000000  |
|       | H | -0.416325 | -1.926246 | 0.000000  |
| h-TS2 | C | -0.291059 | 1.711051  | 0.028207  |
|       | H | -1.302002 | 2.079196  | 0.012138  |
|       | H | 0.509334  | 2.431522  | 0.089919  |
|       | C | -0.045690 | 0.420614  | -0.033621 |
|       | H | -1.050800 | -0.327657 | -0.162064 |
|       | C | 1.185098  | -0.259547 | -0.014414 |
|       | N | 2.157962  | -0.861064 | 0.006701  |
|       | O | -2.055976 | -0.990383 | -0.076402 |
|       | H | -1.904556 | -1.465265 | 0.743282  |



**Table S4** The harmonic vibrational frequencies of the major species.

| Species                   | Frequencies( $\text{cm}^{-1}$ )                                                                                                                                                     |
|---------------------------|-------------------------------------------------------------------------------------------------------------------------------------------------------------------------------------|
| $\text{CH}_2=\text{CHCN}$ | 250(242), <sup>a</sup> 368(362), 605(570), 743(683), 909(869), 1043(954), 1055(972), 1148(1096), 1365(1282), 1494(1416), 1749(1615), 2460(2239), 3243(3042), 3273(3078), 3340(3125) |
| OH                        | 3880(3737)                                                                                                                                                                          |
| OHCHCHCN                  | 147, 310, 461, 533, 652, 772, 773, 990, 1044, 1157, 1284, 1411, 1476, 1746, 2437, 3301, 3320, 3918                                                                                  |
| $\text{CH}_2\text{CN}$    | 404, 450, 688, 1072, 1077, 1493, 2205, 3251, 3363                                                                                                                                   |
| $\text{CH}_2\text{O}$     | 1261(1167), 1308(1249), 1585(1500), 1906(1746), 3005(2782), 3075(2843)                                                                                                              |
| $\text{HCOCH}_2\text{CN}$ | 56, 191, 381, 491, 552, 757, 998, 1074, 1094, 1272, 1349, 1465, 1491, 1918, 2482, 3055, 3128, 3200                                                                                  |
| $\text{CH}_2\text{CCN}$   | 135, 279, 464, 616, 895, 986, 1004, 1478, 1847, 2182, 3170, 3260                                                                                                                    |
| CHCHCN                    | 253, 388, 585, 735, 814, 906, 1039, 1303, 1706, 2461, 3178, 3348                                                                                                                    |
| $\text{H}_2\text{O}$      | 1651(1595), 3983(3657), 4087(3756)                                                                                                                                                  |
| HCN                       | 816(712), 816(712), 2303(2089), 3548(3312)                                                                                                                                          |
| $\text{CH}_2\text{CHO}$   | 476, 523, 788, 1013, 1015, 1192, 1444, 1524, 1579, 3075, 3232, 3350                                                                                                                 |
| $\text{CH}_3$             | 525(606), 1451(1396), 1451(1396), 3189(3004), 3373(3160), 3373(3160)                                                                                                                |
| $\text{HCOCN}$            | 247, 326, 653, 959, 1051, 1459, 1896, 2464, 3114                                                                                                                                    |
| $\text{CH}_3\text{COCN}$  | 130, 193, 274, 453, 620, 634, 747, 1027, 1090, 1247, 1452, 1512, 1516, 1902, 2459, 3122, 3186, 3240                                                                                 |
| CR1                       | 8, 36, 99, 154, 249, 257, 377, 606, 744, 909, 1041, 1053, 1148, 1365, 1494, 1740, 2457, 3244, 3279, 3344, 3884                                                                      |
| 1-IM1                     | 55, 199, 347, 412, 438, 571, 621, 918, 1080, 1124, 1151, 1228, 1366, 1436, 1480, 1544, 2213, 3111, 3149, 3277, 3997                                                                 |
| 1-IM2                     | 107, 173, 404, 421, 553, 561, 881, 987, 1067, 1119, 1199, 1337, 1349, 1440, 1466, 1524, 2475, 3055, 3081, 3149, 3194                                                                |
| 1-IM3                     | 94, 178, 359, 399, 409, 551, 630, 964, 991, 1069, 1222, 1274, 1290, 1404, 1489, 1514, 2482, 3060, 3113, 3294, 3985                                                                  |
| 2-IM1                     | 113, 205, 252, 357, 417, 530, 610, 645, 836, 1004, 1120, 1178, 1273, 1380, 1456, 1496, 2473, 3113, 3239, 3364, 3980                                                                 |

|       |                                                                                                                                         |
|-------|-----------------------------------------------------------------------------------------------------------------------------------------|
| 2-IM2 | 104, 202, 266, 374, 400, 463, 650, 774, 1048, 1055, 1201, 1403, 1455, 1479, 1517, 1552, 2248, 3104, 3154, 3221, 3985                    |
| 2-IM3 | 89, 202, 362, 387, 400, 565, 686, 917, 948, 1054, 1239, 1266, 1353, 1375, 1499, 1506, 2464, 3139, 3185, 3243, 4015                      |
| 2-IM4 | 200, 223, 250, 303, 536, 617, 817, 920, 1005, 1083, 1167, 1270, 1393, 1455, 1532, 1548, 2473, 3075, 3138, 3222, 3231                    |
| 3-IM1 | 130, 280, 424, 484, 508, 588, 807, 869, 1042, 1058, 1077, 1260, 1362, 1371, 1493, 1726, 1786, 3241, 3287, 3336, 3965                    |
| 3-IM2 | 110, 259, 282, 480, 509, 627, 798, 850, 1064, 1067, 1108, 1158, 1301, 1371, 1487, 1628, 1753, 3236, 3282, 3331, 3563                    |
| 1-TS1 | 313 <i>i</i> , <sup>b</sup> 97, 151, 229, 250, 447, 602, 707, 768, 911, 997, 1029, 1146, 1329, 1474, 1623, 2415, 3265, 3280, 3368, 3903 |
| 1-TS2 | 807 <i>i</i> , 176, 189, 400, 439, 467, 482, 550, 589, 818, 1048, 1072, 1192, 1305, 1353, 1434, 1674, 2428, 3263, 3306, 3976            |
| 1-TS3 | 2346 <i>i</i> , 146, 231, 437, 571, 656, 836, 917, 1015, 1135, 1149, 1160, 1215, 1360, 1395, 1579, 1976, 2421, 3161, 3223, 3258         |
| 1-TS4 | 1982 <i>i</i> , 140, 197, 272, 419, 471, 564, 738, 772, 1029, 1145, 1243, 1267, 1332, 1400, 1486, 2205, 2389, 3275, 3284, 3918          |
| 1-TS5 | 634 <i>i</i> , 78, 143, 297, 401, 508, 599, 773, 906, 1029, 1108, 1159, 1274, 1474, 1500, 1627, 2358, 3045, 3129, 3236, 3335            |
| 1-TS6 | 872 <i>i</i> , 92, 180, 389, 424, 462, 493, 558, 807, 1000, 1060, 1091, 1267, 1350, 1442, 1496, 1754, 2480, 3051, 3133, 3199            |
| 1-TS7 | 777 <i>i</i> , 189, 195, 334, 409, 468, 523, 568, 582, 916, 999, 1062, 1194, 1313, 1360, 1432, 1701, 2456, 3263, 3310, 3969             |
| 1-TS8 | 1462 <i>i</i> , 58, 168, 216, 382, 476, 550, 601, 752, 1001, 1045, 1083, 1263, 1352, 1443, 1487, 1696, 2483, 3104, 3125, 3174           |
| 1-TS9 | 498 <i>i</i> , 103, 148, 243, 365, 538, 704, 927, 954, 1008, 1071, 1211, 1313, 1378, 1524, 1667, 2209, 2343, 3237, 3257, 3362           |
| 2-TS1 | 475 <i>i</i> , 159, 196, 238, 277, 451, 600, 652, 831, 898, 934, 1037, 1143, 1308, 1472, 1599, 2464, 3244, 3299,                        |

|       |                                                                                                                                     |
|-------|-------------------------------------------------------------------------------------------------------------------------------------|
|       | 3353, 3912                                                                                                                          |
| 2-TS2 | 2067 <sub>i</sub> , 196, 289, 367, 399, 422, 591, 628, 710, 791, 997, 1208, 1288, 1365, 1426, 1478, 2219, 2392, 3259, 3395, 3984    |
| 2-TS3 | 237 <sub>i</sub> , 52, 76, 243, 311, 446, 504, 700, 920, 1017, 1029, 1214, 1349, 1387, 1500, 1685, 2273, 3262, 3281, 3379, 3985     |
| 2-TS4 | 2286 <sub>i</sub> , 211, 242, 399, 557, 593, 740, 863, 1015, 1030, 1110, 1138, 1176, 1306, 1427, 1481, 2003, 2478, 3178, 3214, 3333 |
| 2-TS5 | 392 <sub>i</sub> , 126, 143, 256, 283, 454, 575, 591, 652, 906, 963, 1031, 1428, 1460, 1472, 1603, 2458, 3122, 3173, 3345, 3356     |
| 2-TS6 | 1016 <sub>i</sub> , 181, 196, 288, 434, 470, 511, 637, 643, 755, 1033, 1080, 1232, 1454, 1518, 1523, 1707, 2458, 3122, 3199, 3240   |
| 3-TS1 | 556 <sub>i</sub> , 76, 202, 259, 361, 400, 513, 749, 865, 898, 1038, 1065, 1128, 1368, 1485, 1753, 2169, 3252, 3273, 3359, 3911     |
| 3-TS2 | 504 <sub>i</sub> , 63, 180, 218, 278, 283, 376, 561, 819, 907, 987, 1096, 1120, 1287, 1431, 1697, 2285, 3161, 3268, 3343, 3924      |
| h-TS1 | 2156 <sub>i</sub> , 84, 160, 200, 271, 403, 559, 639, 699, 819, 868, 951, 979, 1142, 1337, 1511, 1730, 2459, 3234, 3298, 3914       |
| h-TS2 | 2084 <sub>i</sub> , 95, 136, 208, 237, 402, 498, 615, 714, 775, 924, 1035, 1067, 1169, 1361, 1475, 1754, 2414, 3220, 3320, 3925     |

<sup>a</sup>experimental data from ref. 49; <sup>b</sup><sub>i</sub> stands for imaginary frequency

**Note S1: Other unimportant channels from 1-IM1, 2-IM1 and 3-IM1**

1-IM2 can convert to 1-IM3 through 1-TS14 with a barrier of 27.75 kcal/mol. Apparently, the transition between 1-IM2 and 1-IM3 is not easy. 1-P8 (HCO+CH<sub>2</sub>CNH) and 1-P9 (H+HCOCHCNH) can be generated by paths of 1-IM2→1-TS13→1-IM5→1-TS19→1-P8 and 1-IM2→1-TS13→1-IM5→1-TS20→1-P9, respectively. 1-IM1 can undergo 1,4 H-shift via 1-TS11 with a barrier of 68.07 kcal/mol to generate 1-IM4.

Starting from 2-IM1, 2-IM2 and 2-IM3, there are less important paths:

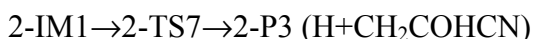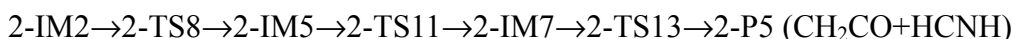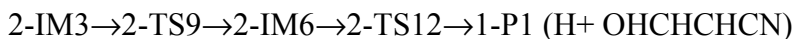

Starting from 3-IM1, the product channels of 3-P1 (CH<sub>2</sub>CH+HOCN) and 3-P2 (C<sub>2</sub>H<sub>2</sub>+HOCNH) are found as follows:

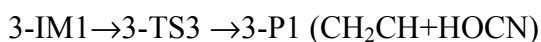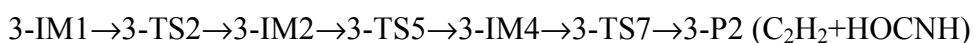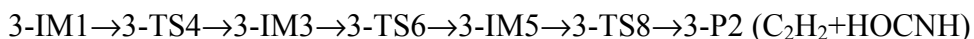

### Note S2: Multichannel RRKM treatment for the OH+CH<sub>2</sub>=CHCN reaction

The reaction schemes employed in the calculation is as follows:

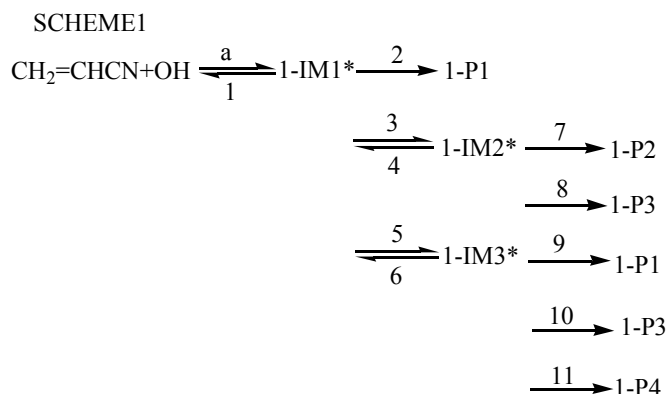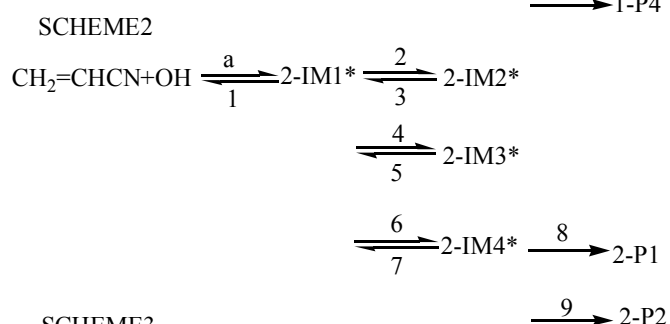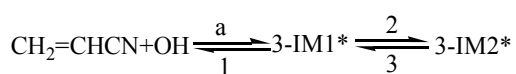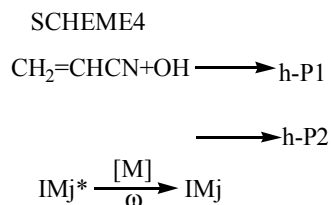

Where "\*" represents the vibrational excitation of intermediate (IM<sub>j</sub>). Steady-state approximation for energized intermediate (IM<sub>j</sub>\*) leads to the following expressions:

For Scheme 1:

$$k_{1-P1}(T, P) = \frac{\alpha_a}{h} \frac{Q_t^\ddagger Q_r^\ddagger}{Q_{\text{CH}_2=\text{CHCN}} Q_{\text{OH}}} e^{-E_a/RT} \times \int_0^\infty \frac{k_2(E)}{X_4} + \frac{k_5(E)k_9(E)}{X_3 X_4} N_a(E^\ddagger) e^{-E^\ddagger/RT} dE^\ddagger \quad (1)$$

$$k_{1-P2}(T, P) = \frac{\alpha_a}{h} \frac{Q_t^\ddagger Q_r^\ddagger}{Q_{\text{CH}_2=\text{CHCN}} Q_{\text{OH}}} e^{-E_a/RT} \times \int_0^\infty \frac{k_7(E)k_3(E)}{X_2 X_4} N_a(E^\ddagger) e^{-E^\ddagger/RT} dE^\ddagger \quad (2)$$

$$k_{1-P3}(T, P) = \frac{\alpha_a}{h} \frac{Q_t^\ddagger Q_r^\ddagger}{Q_{\text{CH}_2=\text{CHCN}} Q_{\text{OH}}} e^{-E_a/RT} \times \int_0^\infty \frac{k_3(E)k_8(E)}{X_2 X_4} + \frac{k_5(E)k_{10}(E)}{X_3 X_4} N_a(E^\ddagger) e^{-E^\ddagger/RT} dE^\ddagger$$

(3)

$$k_{1-P4}(T, P) = \frac{\alpha_a}{h} \frac{Q_t^\ddagger Q_r^\ddagger}{Q_{CH_2=CHCN} Q_{OH}} e^{-E_a/RT} \times \int_0^\infty \frac{k_5(E)k_{11}(E)}{X_3 X_4} N_a(E^\ddagger) e^{-E^\ddagger/RT} dE^\ddagger \quad (4)$$

$$k_{1-IM1}(T, P) = \frac{\alpha_a}{h} \frac{Q_t^\ddagger Q_r^\ddagger}{Q_{CH_2=CHCN} Q_{OH}} e^{-E_a/RT} \times \int_0^\infty \frac{\omega}{X_4} N_a(E^\ddagger) e^{-E^\ddagger/RT} dE^\ddagger \quad (5)$$

$$k_{1-IM2}(T, P) = \frac{\alpha_a}{h} \frac{Q_t^\ddagger Q_r^\ddagger}{Q_{CH_2=CHCN} Q_{OH}} e^{-E_a/RT} \times \int_0^\infty \frac{\omega k_3(E)}{X_2 X_4} N_a(E^\ddagger) e^{-E^\ddagger/RT} dE^\ddagger \quad (6)$$

$$k_{1-IM3}(T, P) = \frac{\alpha_a}{h} \frac{Q_t^\ddagger Q_r^\ddagger}{Q_{CH_2=CHCN} Q_{OH}} e^{-E_a/RT} \times \int_0^\infty \frac{\omega k_5(E)}{X_3 X_4} N_a(E^\ddagger) e^{-E^\ddagger/RT} dE^\ddagger \quad (7)$$

With the following definition:

$$X_1 = k_1(E) + k_2(E) + k_3(E) + k_5(E) + \omega$$

$$X_2 = k_4(E) + k_7(E) + k_8(E) + \omega$$

$$X_3 = k_6(E) + k_9(E) + k_{10}(E) + k_{11}(E) + \omega$$

$$X_4 = X_1 - k_3(E) * k_4(E) / X_2 - k_5(E) * k_6(E) / X_3$$

For Scheme 2:

$$k_{2-P1}(T, P) = \frac{\alpha_a}{h} \frac{Q_t^\ddagger Q_r^\ddagger}{Q_{CH_2=CHCN} Q_{OH}} e^{-E_a/RT} \times \int_0^\infty \frac{k_8(E)k_2(E)}{X_1 X_5} N_a(E^\ddagger) e^{-E^\ddagger/RT} dE^\ddagger \quad (8)$$

$$k_{2-P2}(T, P) = \frac{\alpha_a}{h} \frac{Q_t^\ddagger Q_r^\ddagger}{Q_{CH_2=CHCN} Q_{OH}} e^{-E_a/RT} \times \int_0^\infty \frac{k_9(E)k_2(E)}{X_1 X_5} N_a(E^\ddagger) e^{-E^\ddagger/RT} dE^\ddagger \quad (9)$$

$$k_{2-IM1}(T, P) = \frac{\alpha_a}{h} \frac{Q_t^\ddagger Q_r^\ddagger}{Q_{CH_2=CHCN} Q_{OH}} e^{-E_a/RT} \times \int_0^\infty \frac{\omega}{X_5} N_a(E^\ddagger) e^{-E^\ddagger/RT} dE^\ddagger \quad (10)$$

$$k_{2-IM2}(T, P) = \frac{\alpha_a}{h} \frac{Q_t^\ddagger Q_r^\ddagger}{Q_{CH_2=CHCN} Q_{OH}} e^{-E_a/RT} \times \int_0^\infty \frac{\omega k_2(E)}{X_1 X_5} N_a(E^\ddagger) e^{-E^\ddagger/RT} dE^\ddagger \quad (11)$$

$$k_{2-IM3}(T, P) = \frac{\alpha_a}{h} \frac{Q_t^\ddagger Q_r^\ddagger}{Q_{CH_2=CHCN} Q_{OH}} e^{-E_a/RT} \times \int_0^\infty \frac{\omega k_4(E)}{X_2 X_5} N_a(E^\ddagger) e^{-E^\ddagger/RT} dE^\ddagger \quad (12)$$

$$k_{2-IM4}(T, P) = \frac{\alpha_a}{h} \frac{Q_t^\ddagger Q_r^\ddagger}{Q_{CH_2=CHCN} Q_{OH}} e^{-E_a/RT} \times \int_0^\infty \frac{\omega k_6(E)}{X_3 X_5} N_a(E^\ddagger) e^{-E^\ddagger/RT} dE^\ddagger \quad (13)$$

With the following definition:

$$X_1 = k_3(E) + k_8(E) + k_9(E) + \omega$$

$$X_2 = k_5(E) + \omega$$

$$X_3 = k_7(E) + \omega$$

$$X_4 = k_2(E) + k_4(E) + k_6(E) + \omega$$

$$X_5 = X_4 - k_2(E) * k_3(E) / X_1 - k_4(E) * k_5(E) / X_2 - k_6(E) * k_7(E) / X_3$$

For Scheme 3:

$$k_{3-IM1}(T, P) = \frac{\alpha_a}{h} \frac{Q_t^\ddagger Q_r^\ddagger}{Q_{CH_2=CHCN} Q_{OH}} e^{-E_a / RT} \times \int_0^\infty \frac{\omega}{X_3} N_a(E^\ddagger) e^{-E^\ddagger / RT} dE^\ddagger \quad (14)$$

$$k_{3-IM2}(T, P) = \frac{\alpha_a}{h} \frac{Q_t^\ddagger Q_r^\ddagger}{Q_{CH_2=CHCN} Q_{OH}} e^{-E_a / RT} \times \int_0^\infty \frac{X_2 \omega}{X_3} N_a(E^\ddagger) e^{-E^\ddagger / RT} dE^\ddagger \quad (15)$$

With the following definition:

$$X_1 = k_1(E) + k_2(E) + \omega$$

$$X_2 = k_2(E) / (k_3(E) + \omega)$$

$$X_3 = X_1 - k_3(E) * X_2$$

The microcanonical rate constants are calculated using RRKM theory as follows:

$$k_i(E) = \alpha_i C_i N_i(E_i^\ddagger) / h \rho_j(E_j) \quad (16)$$

In the above equations,  $\alpha_a$  is statistical factor for the reaction path a, and  $\alpha_i$  is the statistical factor (degeneracy) for the  $i$ th reaction path;  $E_a$  is the energy barrier for the reaction step a.  $Q_{OH}$  and  $Q_{CH_2=CHCN}$  are the total partition function of OH and  $CH_2=CHCN$ , respectively;  $Q_t^\ddagger$  and  $Q_r^\ddagger$  are the translational and rotational partition functions of entrance transition state;  $N_a(E^\ddagger)$  is the number of state for the

association transition state with excess energy  $E^\ddagger$  above the association barrier.  $k_i(E)$  is the energy-specific rate constant for the  $i$ th channel, and  $C_i$  is the ratio of the overall rotational partition function of  $TS_i$  and  $IM_j$ ;  $N_i(E_i^\ddagger)$  is the number of states at the energy above the barrier height for transition state  $i$ ;  $\rho_j(E_j)$  is the density of states at energy  $E_j$  of intermediate  $j$ . The density of states and the number of states are calculated using the extended Beyer-Swinehart algorithm. Where  $\omega = \beta_c Z_{LJ}[M]$ , and  $\beta_c$  is the collision efficiency, which is calculated using Troe's weak collision approximation with the energy transfer parameter  $-\langle \Delta E \rangle$ .  $Z_{LJ}$  is Lennard-Jones collision frequency, and  $[M]$  is the concentration of the bath gas M.
